# Supplementary material
Source: publisher site journal article supplement (https://www.spandidos-publications.com/2551/downloadSupplementary)

Figure S1. Effects of PLCE1 silencing on its expression in Eca109 cells. Expression of PLCE1 protein was identified by western blotting, and  $\beta$ -actin acted as the control. PLCE1, phospholipase C epsilon 1.

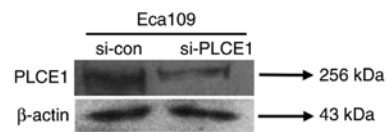

Figure S2. Metascape analysis for DEGs involved in the ceRNA. (A) Network of enriched sets coloured by ID. Threshold: 0.3 kappa score; similarity score >0.3. (B) Heatmap colored by P-values (P<0.05 cutoff was regarded as statistical importance). DEGs, differentially expressed genes; ceRNA, competing endogenous RNA.

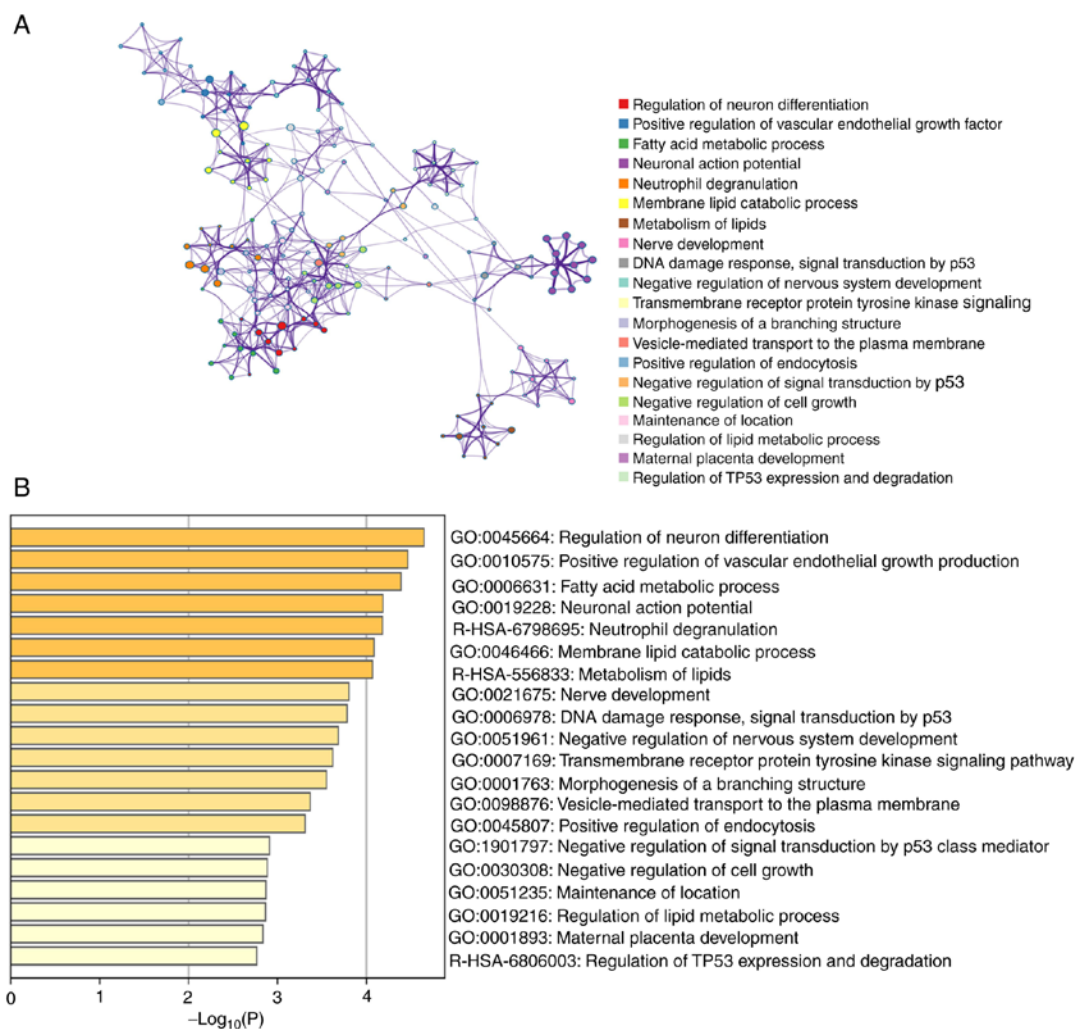

Figure S3. Construction of the hub genes-lncRNA-miRNA network. lncRNA, long non-coding RNA; mRNA, messenger RNA; miRNA, microRNA.

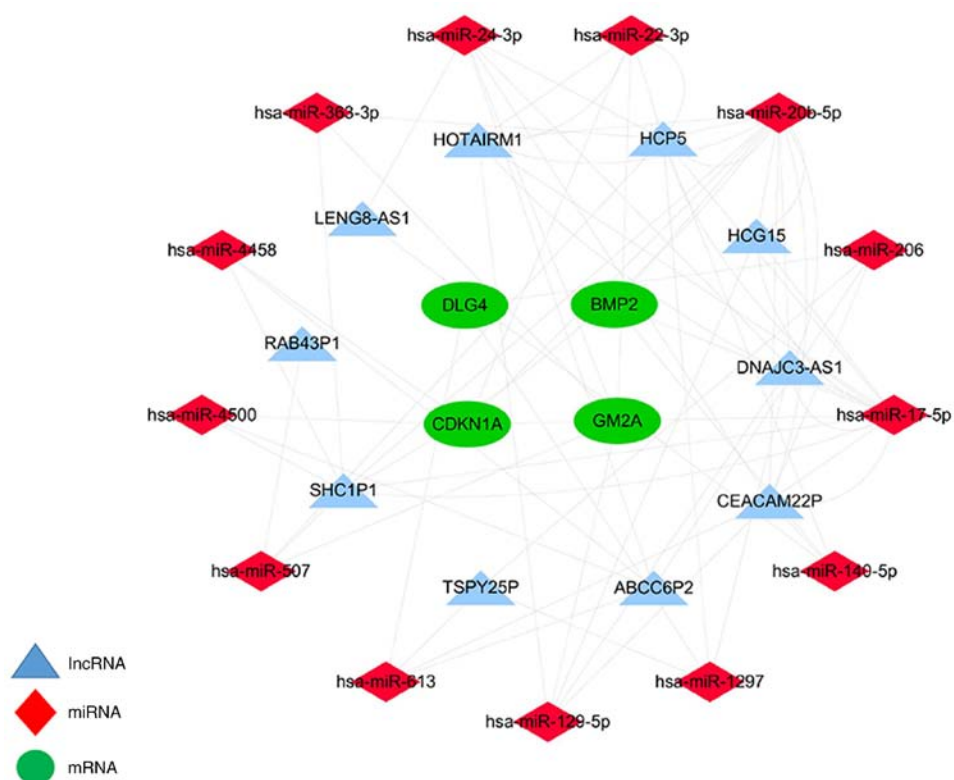

Figure S4. lncRNAs express different profiles in ESCA (T) and adjacent (N) tissues. (A) HCG15 and (B) HOTAIRM1. lncRNAs, long non-coding RNAs.

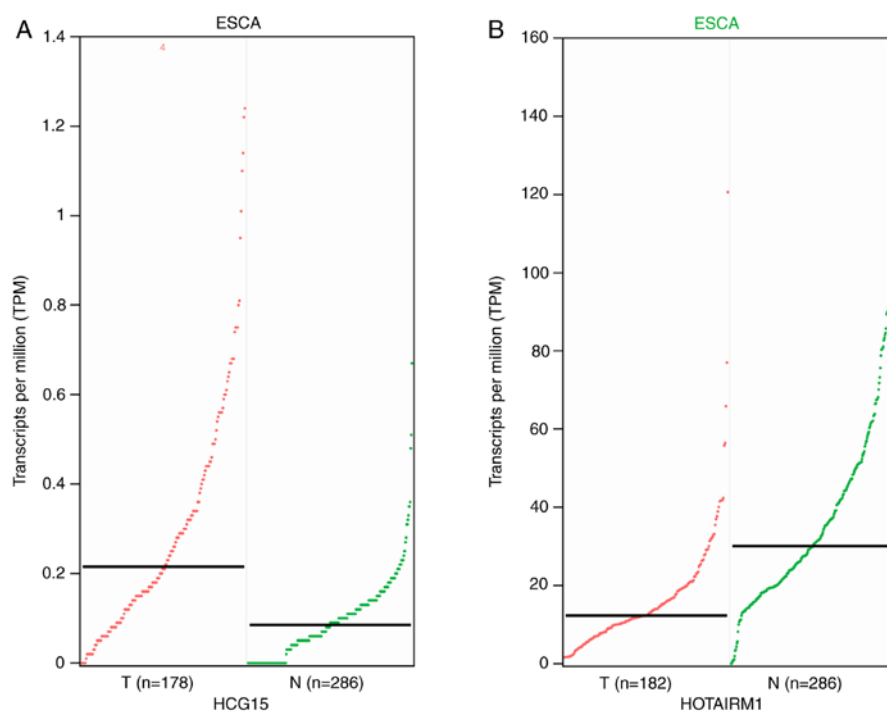

Figure S5. Different expression profiles of miRNAs in ESCA and adjacent tissues.

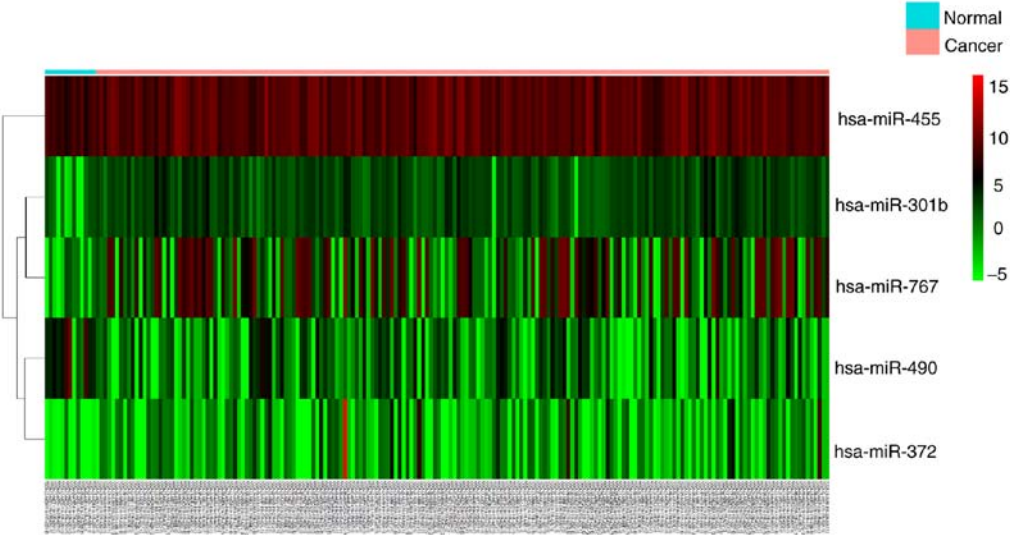

Supplement: Supplementary file 1 [file downloadSupplementary]
